# Supplementary material
Source: PubMed Central journal article supplement (PMC7662891)
Supplement: ee9-2-e027-s001.pdf [file ee9-2-e027-s001.pdf]

## Supplementary Tables

**Supplemental Table 1.** Adjusted<sup>a</sup> odds ratios and 95% confidence intervals for cessation of full breastfeeding at 3 and 6 months in association with an interquartile range difference in plasma for per- and polyfluoroalkyl substances

|                                        | Cessation of full breastfeeding <3 months<br>OR (95% CI)<br>n=192 | Cessation of full breastfeeding <6 months<br>OR (95% CI)<br>n=362 |
|----------------------------------------|-------------------------------------------------------------------|-------------------------------------------------------------------|
| <b>Perfluoroalkyl carboxylic acids</b> |                                                                   |                                                                   |
| PFOA                                   | 0.84 (0.66, 1.08)                                                 | 0.95 (0.79, 1.15)                                                 |
| PFNA                                   | 0.73 (0.59, 0.91)                                                 | 0.83 (0.70, 0.98)                                                 |
| PFDA                                   | 0.70 (0.58, 0.84)                                                 | 0.80 (0.69, 0.93)                                                 |
| PFO <sub>n</sub> DA                    | 0.70 (0.58, 0.84)                                                 | 0.79 (0.68, 0.91)                                                 |
| PFDoDA <sup>b</sup>                    | 0.97 (0.65, 1.45)                                                 | 0.88 (0.65, 1.19)                                                 |
| PFO <sub>n</sub> TrDA <sup>b</sup>     | 0.97 (0.66, 1.43)                                                 | 0.97 (0.72, 1.29)                                                 |
| <b>Perfluoroalkyl sulfonates</b>       |                                                                   |                                                                   |
| PFH <sub>x</sub> S                     | 0.86 (0.72, 1.03)                                                 | 0.91 (0.80, 1.05)                                                 |
| PFHpS                                  | 0.96 (0.79, 1.15)                                                 | 0.96 (0.83, 1.11)                                                 |
| PFOS                                   | 0.99 (0.80, 1.21)                                                 | 0.98 (0.83, 1.14)                                                 |

<sup>a</sup> Model was adjusted for parity (parous vs. nulliparous), previous breastfeeding duration (continuous, months), maternal age at birth (continuous), smoking during pregnancy (any vs. none), pre-pregnancy BMI (underweight, normal, overweight, obese), and prior study status (subfecundity control, subfecundity case, preeclampsia control, subfecundity case).

<sup>b</sup> HR in association with concentrations > vs. ≤LOQ for PFDoDA and PFO<sub>n</sub>TrDA.

**Supplemental Table 2.** Adjusted<sup>a</sup> hazard ratios and 95% confidence intervals for cessation of breastfeeding at 3 and 6 months in association with an interquartile range difference in plasma for per- and polyfluoroalkyl substances, stratified by parity

|                                  | Cessation of breastfeeding <3 months | Cessation of breastfeeding <6 months |
|----------------------------------|--------------------------------------|--------------------------------------|
|                                  | HR (95% CI)<br>n=145                 | HR (95% CI)<br>n=281                 |
| <i>Nulliparous (n = 1285)</i>    |                                      |                                      |
| Perfluoroalkyl carboxylic acids  |                                      |                                      |
| PFOA                             | 0.84 (0.67, 1.04)                    | 0.91 (0.78, 1.06)                    |
| PFNA                             | 0.72 (0.58, 0.88)                    | 0.81 (0.69, 0.95)                    |
| PFDA                             | 0.69 (0.58, 0.82)                    | 0.78 (0.68, 0.89)                    |
| PFUnDA                           | 0.68 (0.57, 0.81)                    | 0.78 (0.68, 0.90)                    |
| PFD <sub>o</sub> DA <sup>b</sup> | 0.97 (0.64, 1.46)                    | 0.88 (0.65, 1.19)                    |
| PFT <sub>r</sub> DA <sup>b</sup> | 0.87 (0.58, 1.30)                    | 0.98 (0.74, 1.29)                    |
| Perfluoroalkyl sulfonates        |                                      |                                      |
| PFH <sub>x</sub> S               | 0.93 (0.78, 1.11)                    | 0.96 (0.84, 1.09)                    |
| PFH <sub>p</sub> S               | 0.95 (0.77, 1.16)                    | 0.96 (0.83, 1.11)                    |
| PFOS                             | 0.94 (0.77, 1.16)                    | 0.94 (0.81, 1.09)                    |
| <i>Multiparous (n = 431)</i>     |                                      |                                      |
| Perfluoroalkyl carboxylic acids  |                                      |                                      |
| PFOA                             | 1.13 (0.67, 1.90)                    | 1.24 (0.87, 1.79)                    |
| PFNA                             | 1.22 (0.80, 1.85)                    | 1.08 (0.81, 1.45)                    |
| PFDA                             | 1.17 (0.77, 1.78)                    | 1.17 (0.86, 1.61)                    |
| PFUnDA                           | 1.20 (0.79, 1.83)                    | 1.12 (0.81, 1.54)                    |
| PFD <sub>o</sub> DA <sup>b</sup> | 1.04 (0.45, 2.40)                    | 1.05 (0.59, 1.85)                    |
| PFT <sub>r</sub> DA <sup>b</sup> | 1.67 (0.78, 3.58)                    | 1.07 (0.59, 1.94)                    |
| Perfluoroalkyl sulfonates        |                                      |                                      |
| PFH <sub>x</sub> S               | 0.84 (0.62, 1.13)                    | 0.88 (0.70, 1.10)                    |
| PFH <sub>p</sub> S               | 1.06 (0.72, 1.54)                    | 0.97 (0.75, 1.25)                    |
| PFOS                             | 1.40 (0.94, 2.09)                    | 1.37 (1.01, 1.87)                    |

<sup>a</sup> Model was adjusted maternal age at birth (continuous), smoking during pregnancy (any vs. none), pre-pregnancy BMI (underweight, normal, overweight, obese), and prior study status (subfecundity control, subfecundity case, preeclampsia control, subfecundity case). The model for the

multiparous women was additionally adjusted for previous breastfeeding duration (continuous, months),  
<sup>b</sup>HR in association with concentrations > vs. ≤LOQ for PFDoDA and PFTrDA.

**Supplemental Table 3.** Adjusted<sup>a</sup> odd ratios and 95% confidence intervals for initiation of any breastfeeding in association with an interquartile range difference in plasma for per- and polyfluoroalkyl substances

|                                        | Breastfeeding initiation<br>OR (95% CI) |
|----------------------------------------|-----------------------------------------|
| <b>Perfluoroalkyl carboxylic acids</b> |                                         |
| PFOA                                   | 1.04 (0.70, 1.54)                       |
| PFNA                                   | 1.05 (0.73, 1.52)                       |
| PFDA                                   | 1.07 (0.77, 1.50)                       |
| PFUnDA                                 | 0.99 (0.70, 1.41)                       |
| PFDoDA <sup>b</sup>                    | 1.15 (0.60, 2.20)                       |
| PFTrDA <sup>b</sup>                    | 1.09 (0.59, 2.02)                       |
| <b>Perfluoroalkyl sulfonates</b>       |                                         |
| PFHxS                                  | 1.16 (0.86, 1.56)                       |
| PFHpS                                  | 0.77 (0.55, 1.09)                       |
| PFOS                                   | 0.98 (0.70, 1.37)                       |

<sup>a</sup>Model was adjusted for parity (parous vs. nulliparous), previous breastfeeding duration (continuous, months), maternal age at birth (continuous), smoking during pregnancy (any vs. none), pre-pregnancy BMI (underweight, normal, overweight, obese), and prior study status (subfecundity control, subfecundity case, preeclampsia control, subfecundity case).

<sup>b</sup>HR in association with concentrations > vs. ≤LOQ for PFDoDA and PFTrDA.

**Supplemental Table 4.** Adjusted<sup>a</sup> hazards ratios and 95% confidence intervals for cessation of breastfeeding at 3 and 6 months in association with an interquartile range difference in plasma for per- and polyfluoroalkyl substances, controls only (n=961)

|                                        | Cessation of full breastfeeding <3 months<br>HR (95% CI)<br>n=91 | Cessation of full breastfeeding <6 months<br>HR (95% CI)<br>n=169 |
|----------------------------------------|------------------------------------------------------------------|-------------------------------------------------------------------|
| <b>Perfluoroalkyl carboxylic acids</b> |                                                                  |                                                                   |
| PFOA                                   | 0.99 (0.70, 1.38)                                                | 1.07 (0.83, 1.36)                                                 |
| PFNA                                   | 0.85 (0.65, 1.11)                                                | 0.96 (0.78, 1.17)                                                 |
| PFDA                                   | 0.79 (0.64, 0.96)                                                | 0.87 (0.74, 1.03)                                                 |
| PFUnDA                                 | 0.65 (0.54, 0.79)                                                | 0.74 (0.63, 0.87)                                                 |
| PFD <sub>o</sub> DA <sup>b</sup>       | 0.83 (0.48, 1.44)                                                | 0.81 (0.55, 1.21)                                                 |
| PFTrDA <sup>b</sup>                    | 0.86 (0.53, 1.41)                                                | 0.83 (0.58, 1.18)                                                 |
| <b>Perfluoroalkyl sulfonates</b>       |                                                                  |                                                                   |
| PFH <sub>x</sub> S                     | 0.84 (0.66, 1.07)                                                | 0.93 (0.77, 1.11)                                                 |
| PFH <sub>p</sub> S                     | 1.05 (0.80, 1.37)                                                | 1.05 (0.87, 1.28)                                                 |
| PFOS                                   | 1.06 (0.81, 1.39)                                                | 1.07 (0.87, 1.30)                                                 |

<sup>a</sup> Model was adjusted for parity (parous vs. nulliparous), previous breastfeeding duration (continuous, months), maternal age at birth (continuous), smoking during pregnancy (any vs. none), pre-pregnancy BMI (underweight, normal, overweight, obese), and prior study status (subfecundity control, preeclampsia control).

<sup>b</sup> HR in association with concentrations > vs. ≤LOQ for PFD<sub>o</sub>DA and PFTrDA.

**Supplemental Table 5.** Pearson correlation coefficients of ln-transformed and imputed exposures

|               | <b>PFOA</b> | <b>PFNA</b> | <b>PFDA</b> | <b>PFUnDA</b> | <b>PFDODA</b> | <b>PFTrDA</b> | <b>PFHXS</b> | <b>PFHPS</b> | <b>PFOS</b> |
|---------------|-------------|-------------|-------------|---------------|---------------|---------------|--------------|--------------|-------------|
| <b>PFOA</b>   | 1           |             |             |               |               |               |              |              |             |
| <b>PFNA</b>   | 0.64        | 1           |             |               |               |               |              |              |             |
| <b>PFDA</b>   | 0.42        | 0.75        | 1           |               |               |               |              |              |             |
| <b>PFUnDA</b> | 0.17        | 0.45        | 0.65        | 1             |               |               |              |              |             |
| <b>PFDODA</b> | 0.10        | 0.28        | 0.43        | 0.46          | 1             |               |              |              |             |
| <b>PFTrDA</b> | 0.03        | 0.24        | 0.31        | 0.39          | 0.44          | 1             |              |              |             |
| <b>PFHXS</b>  | 0.52        | 0.42        | 0.30        | 0.24          | 0.08          | 0.08          | 1            |              |             |
| <b>PFHPS</b>  | 0.53        | 0.37        | 0.24        | 0.21          | 0.01          | 0.02          | 0.49         | 1            |             |
| <b>PFOS</b>   | 0.62        | 0.50        | 0.41        | 0.38          | 0.13          | 0.06          | 0.56         | 0.66         | 1           |
